# Supplementary material for: Lentivirus Live Cell Array for Quantitative Assessment of Gene and Pathway Activation during Myogenic Differentiation of Mesenchymal Stem Cells
Source: PubMed Central journal article supplement (PMC4624764; doi:10.1371/journal.pone.0141365), 2015-10-27
Supplement: pone.0141365.s002.pdf [file pone.0141365.s002.pdf]

**S1 Table. Oligos and primers used for cloning transcriptional response elements and promoters, respectively, in the LVDP**

| <i>REs</i>  | <i>Cloning Sites</i> | <i>Oligos/Primers (5' to 3')</i>                                                                                                                                                                                          | <i>Reference</i>    |
|-------------|----------------------|---------------------------------------------------------------------------------------------------------------------------------------------------------------------------------------------------------------------------|---------------------|
| MAPK/ERK-RE | BstBI,<br>HpaI       | For:<br>AACGGATGTCCATATTAGGAGGATGTCCATATTAGGAGGATGTCCATATT<br>AGGAGGATGTCCATATTAGGAGGATGTCCATATTAGGATT<br>Rev:<br>CGAATCCTAATATGGACATCCTCCTAATATGGACATCCTCCTAATATGGA<br>CATCCTCCTAATATGGACATCCTCCTAATATGGACATCCGTT        | SABiosciences, inc. |
| CArG-RE     | BstBI,<br>HpaI       | For:<br>AACCCATAAAAGGCCATAAAAGGCCATAAAAGGCCATAAAAGGCCATAA<br>AAGGCCATAAAAGGTT<br>Rev:<br>CGAACCTTTTATGGCCTTTTATGGCCTTTTATGGCCTTTTATGGCCTTTTAT<br>GGCCTTTTATGGGTT                                                          | SABiosciences, inc. |
| CArGA-RE    | BstBI,<br>HpaI       | For:<br>AACCTTGTTTGGCCTTGTTTGGCCTTGTTTGGCCTTGTTTGGCCTTGTTT<br>GCCTTGTTTGGTT<br>Rev:<br>CGAACCAAACAAGGCCAAACAAGGCCAAACAAGGCCAAACAAGGCCAA<br>ACAAGGCCAAACAAGGGTT                                                            | (1)                 |
| EGR1-RE     | BstBI,<br>HpaI       | For:<br>AACCGCCCCGCGCGCCCCGCGCGCCCCGCGCGCCCCGCGCGCCCC<br>GCGCGCCCCGCGTT<br>Rev:<br>CGAACGCGGGGGCGCGCGGGGGCGCGCGGGGGCGCGCGGGGGCGCGCG<br>GGGGCGCGGGGGCGGTT                                                                  | SABiosciences, inc. |
| KLF4-RE     | BstBI,<br>HpaI       | For:<br>AACAGGGTGTGGCCAGGGTGTGGCCAGGGTGTGGCCAGGGTGTGGCCAG<br>GGTGTGGCCAGGGTGTGGCCTT<br>Rev:<br>CGAAGGCCACACCCTGGCCACACCCTGGCCACACCCTGGCCACACCCTGG<br>CCACACCCTGGCCACACCCTGTT                                              | SABiosciences, inc. |
| MEF2-RE     | BstBI,<br>BsiWI      | For:<br>GTACGCTAGCGCTCTAAAAATAACCCTCTAGCGCTCTAAAAATAACCCTC<br>TAGCGCTCTAAAAATAACCCTCTAGCGCTCTAAAAATAACCCTTTT<br>Rev:<br>CGAAAGGGTTATTTTTAGAGCGCTAGAGGGTTATTTTTAGAGCGCTAGAG<br>GGTTATTTTTAGAGCGCTAGAGGGTTATTTTTAGAGCGCTAGC | (2)                 |
| SP1-RE      | BstBI,<br>BsiWI      | For:<br>GTACGGGGCGGGGCGGGGCGGGGCGGGGCGGGGCGGGGCGGGGCGGG<br>GCGGGGCGGGGCGGGGCTT<br>Rev:<br>CGAAGCCCCGCCCCGCCCCGCCCCGCCCCGCCCCGCCCCGCCCCGCCCC<br>CCCCGCCCCGCCCC                                                             | SABiosciences, inc. |
| ATF6-RE     | BstBI,<br>BsiWI      | For:<br>GTACGCTCGAGACAGGTGCTGACGTGGCATTCTCGAGACAGGTGCTGAC<br>GTGGCATTCTCGAGACAGGTGCTGACGTGGCATTCTT<br>Rev:<br>CGAAGAATGCCACGTCAGCACCTGTCTCGAGGAATGCCACGTCAGCACCT<br>GTCTCGAGGAATGCCACGTCAGCACCTGTCTCGAGC                  | SABiosciences, inc. |



|                       |                |                                                                                  |                                                                 |
|-----------------------|----------------|----------------------------------------------------------------------------------|-----------------------------------------------------------------|
| PITX2-Pr              | ClaI, AgeI     | For: ACAACAATCGATCGTGATCTGAGGCGACTTTT<br>Rev: ACAACAACCGGTAAGAGTGACAGGGACAGGTA   | (8)                                                             |
| DES-Pr                | EcoRI,<br>ClaI | For: ACAACAGAATTCTTTATGGGGTCAGGTAGTTG<br>Rev: ACAACAATCGATGTTGAGAGATTCAATTCTGC   | <a href="http://www.switchdb.com/">http://www.switchdb.com/</a> |
| CSRP2-Pr              | ClaI, AgeI     | For: ACAACAATCGATGAGGTCATGAGGAGGCCTAG<br>Rev: ACAACAACCGGTCCTACTCACTTGAGTCGGAG   | <a href="http://www.switchdb.com/">http://www.switchdb.com/</a> |
| MKL2-Pr               | ClaI, AgeI     | For: ACAACAATCGATTTGGGAAGTTTGTAAGTGA<br>Rev: ACAACAACCGGTGACGAACAGGGATGGCTGCC    | <a href="http://www.switchdb.com/">http://www.switchdb.com/</a> |
| ACTB-Pr               | ClaI, AgeI     | For: ACAACAATCGATATAGCAGACATAACAACGGAC<br>Rev: ACAACAACCGGTCAAAGGCGAGGCTCTGTGCT  | <a href="http://www.switchdb.com/">http://www.switchdb.com/</a> |
| rMYH11-Pr<br>(rabbit) | ClaI, AgeI     | For: ACAACAATCGATTCCACACTCAGCCATCTCAC<br>Rev: ACAACAACCGGTAGCAAAGAGCTCCACAACCTCA | (9)                                                             |

### Supplemental References:

- Hautmann MB, Madsen CS, Owens GK. A transforming growth factor beta (TGFbeta) control element drives TGFbeta-induced stimulation of smooth muscle alpha-actin gene expression in concert with two CARG elements. *J Biol Chem.* 1997;272(16):10948-56.
- Lu J, McKinsey TA, Nicol RL, Olson EN. Signal-dependent activation of the MEF2 transcription factor by dissociation from histone deacetylases. *Proc Natl Acad Sci U S A.* 2000;97(8):4070-5.
- Bajpai VK, Mistriotis P, Loh YH, Daley GQ, Andreadis ST. Functional vascular smooth muscle cells derived from human induced pluripotent stem cells via mesenchymal stem cell intermediates. *Cardiovasc Res.* 2012;96(3):391-400.
- Bajpai VK, Mistriotis P, Andreadis ST. Clonal multipotency and effect of long-term in vitro expansion on differentiation potential of human hair follicle derived mesenchymal stem cells. *Stem Cell Res.* 2012;8(1):74-84.
- Reddy S, Ozgur K, Lu M, Chang W, Mohan SR, Kumar CC, et al. Structure of the human smooth muscle alpha-actin gene. Analysis of a cDNA and 5' upstream region. *J Biol Chem.* 1990;265(3):1683-7.
- Solway J, Seltzer J, Samaha FF, Kim S, Alger LE, Niu Q, et al. Structure and expression of a smooth muscle cell-specific gene, SM22 alpha. *J Biol Chem.* 1995;270(22):13460-9.
- Rensen SS, Thijssen VL, De Vries CJ, Doevendans PA, Detera-Wadleigh SD, Van Eys GJ. Expression of the smoothelin gene is mediated by alternative promoters. *Cardiovasc Res.* 2002;55(4):850-63.
- Kioussi C, Briata P, Baek SH, Rose DW, Hamblet NS, Herman T, et al. Identification of a Wnt/Dvl/beta-Catenin --> Pitx2 pathway mediating cell-type-specific proliferation during development. *Cell.* 2002;111(5):673-85.
- Katoh Y, Loukianov E, Koprass E, Zilberman A, Periasamy M. Identification of functional promoter elements in the rabbit smooth muscle myosin heavy chain gene. *J Biol Chem.* 1994;269(48):30538-45.
