# Supplementary material for: Lentivirus Live Cell Array for Quantitative Assessment of Gene and Pathway Activation during Myogenic Differentiation of Mesenchymal Stem Cells
Source: PubMed Central journal article supplement (PMC4624764; doi:10.1371/journal.pone.0141365), 2015-10-27
Supplement: pone.0141365.s003.pdf [file pone.0141365.s003.pdf]

**S2 Table. List of Chemical Inhibitors**

| <i>Inhibitor</i> | <i>Pathway</i> | <i>Concentration</i> | <i>Inhibitor Target</i>      | <i>Company</i>     |
|------------------|----------------|----------------------|------------------------------|--------------------|
| SB431542         | TGFβ1          | 10 μM                | ALK4/5/7: TGFβ-R1            | Tocris             |
| Y27632           | ROCK           | 10 μM                | ROCK1                        | Cayman Chemical    |
| CCG1423          | RhoA           | 10 μM                | Interaction of SRF with MKL1 | Cayman Chemical    |
| SB203580         | p38            | 20 μM                | p38 mapk                     | Cayman Chemical    |
| PD98059          | ERK            | 10 μM                | MEK1                         | Enzo Life Sciences |
| SP600125         | JNK            | 10 μM                | JNK1/2/3                     | Cayman Chemical    |
