# Supplementary material for: Lentivirus Live Cell Array for Quantitative Assessment of Gene and Pathway Activation during Myogenic Differentiation of Mesenchymal Stem Cells
Source: PubMed Central journal article supplement (PMC4624764; doi:10.1371/journal.pone.0141365), 2015-10-27
Supplement: pone.0141365.s004.pdf [file pone.0141365.s004.pdf]

**S3 Table. Details of datasets analyzed**

| <i>Parameter</i>                    | <i>hBM-MS</i> | <i>hHF-MS</i> | <i>Chemical Inhibitor Screen (hHF-MS)</i> |
|-------------------------------------|---------------|---------------|-------------------------------------------|
| G                                   | 2             | 3             | 3                                         |
| H                                   | 27            | 27            | 4                                         |
| I                                   | 2 (GM, DM)    | 2 (GM, DM)    | 10 (GM, DM & 8 inhibitors)                |
| J                                   | 4             | 4             | 4                                         |
| K                                   | 18            | 22            | 15                                        |
| Shape parameters, beta distribution | (3.41,1.48)   | (0.54,0.11)   | (1,0.377)                                 |
