# Supplementary material for: Lentivirus Live Cell Array for Quantitative Assessment of Gene and Pathway Activation during Myogenic Differentiation of Mesenchymal Stem Cells
Source: PubMed Central journal article supplement (PMC4624764; doi:10.1371/journal.pone.0141365), 2015-10-27
Supplement: pone.0141365.s005.pdf [file pone.0141365.s005.pdf]

**S4 Table. Fold changes of Promoters and Response Elements**

| <i>hBM-MSC (n=2)</i> |                    |                        | <i>hHF-MSC (n=3)</i> |                     |                        |
|----------------------|--------------------|------------------------|----------------------|---------------------|------------------------|
| <i>Pr/RE</i>         | <i>Fold change</i> | <i>p-value (curve)</i> | <i>Pr/RE</i>         | <i>Fold change</i>  | <i>p-value (curve)</i> |
| <b>ACTA2-Pr</b>      | <b>7.19 ± 2.68</b> | <b>4.65E-07</b>        | <b>ACTA2-Pr</b>      | <b>12.42 ± 1.40</b> | <b>1.23E-08</b>        |
| <b>CArG-RE</b>       | <b>3.75 ± 0.00</b> | <b>1.95E-04</b>        | <b>CArGA-RE</b>      | <b>5.47 ± 3.40</b>  | <b>7.07E-06</b>        |
| <b>ACTB-Pr</b>       | <b>3.45 ± 0.12</b> | <b>9.24E-06</b>        | <b>CArG-RE</b>       | <b>5.19 ± 0.56</b>  | <b>3.00E-03</b>        |
| <b>Smad2/3-RE</b>    | <b>3.17 ± 0.04</b> | <b>3.31E-07</b>        | <b>Smad 7-RE</b>     | <b>5.14 ± 2.31</b>  | <b>3.35E-06</b>        |
| <b>Smad7-RE</b>      | <b>2.59 ± 0.31</b> | <b>7.65E-06</b>        | <b>ACTB-Pr</b>       | <b>4.62 ± 0.54</b>  | <b>5.99E-06</b>        |
| <b>CArGA-RE</b>      | <b>2.37 ± 0.00</b> | <b>4.17E-07</b>        | <b>Smad2/3-RE</b>    | <b>2.71 ± 0.42</b>  | <b>4.77E-06</b>        |
| <b>SM22-Pr</b>       | <b>1.77 ± 0.13</b> | <b>7.94E-07</b>        | <b>KLF4-RE</b>       | <b>1.76 ± 0.52</b>  | <b>1.85E-02</b>        |
| <b>rMYH11-Pr</b>     | <b>1.34 ± 0.00</b> | <b>5.26E-04</b>        | <b>SM22-Pr</b>       | <b>1.62 ± 0.26</b>  | <b>2.74E-02</b>        |
| <b>KLF4-RE</b>       | <b>1.20 ± 0.00</b> | <b>1.50E-02</b>        | <b>rMYH11-Pr</b>     | <b>1.41 ± 0.17</b>  | <b>9.07E-03</b>        |
| ATF6-RE              | 2.31 ± 0.05        | 2.16E-03               | HIF1-RE              | 1.91 ± 1.13         | 8.12E-01               |
| STAT3-RE             | 1.36 ± 0.01        | 5.26E-01               | KLF5-Pr              | 1.75 ± 0.56         | 6.72E-01               |
| KLF5-Pr              | 1.11 ± 0.48        | 5.50E-01               | ATF6-RE              | 1.63 ± 1.00         | 7.83E-01               |
| DES-Pr               | 1.07 ± 0.03        | 4.42E-02               | DES-Pr               | 1.26 ± 0.21         | 1.20E-02               |
| EGR1-RE              | 1.05 ± 0.11        | 5.69E-02               | EGR1-RE              | 1.07 ± 0.02         | 2.65E-01               |
| SMAD1/5/8-RE         | 1.00 ± 0.00        | 7.53E-03               | SP1-RE               | 1.05 ± 0.06         | 2.47E-01               |
| HIF1-RE              | 1.02 ± 0.04        | 4.66E-02               | CSRP2-Pr             | 1.03 ± 0.10         | 9.31E-02               |
| SMTNB-Pr             | 0.99 ± 0.05        | 2.57E-02               | Smad4-RE             | 0.98 ± 0.07         | 1.54E-01               |
| MKL1-Pr              | 0.99 ± 0.03        | 4.96E-02               | SMTNB-Pr             | 0.98 ± 0.09         | 1.00E-03               |
| SP1-RE               | 0.99 ± 0.06        | 2.60E-01               | Nanog-RE             | 0.90 ± 0.26         | 8.82E-01               |
| CSRP2-Pr             | 0.98 ± 0.01        | 5.00E-03               | MKL1-Pr              | 0.93 ± 0.04         | 2.14E-01               |
| Smad4-RE             | 0.96 ± 0.05        | 1.70E-03               | PITX2-Pr             | 0.93 ± 0.07         | 2.64E-02               |
| p53-RE               | 0.91 ± 0.01        | 1.99E-02               | SMAD1/5/8-RE         | 0.86 ± 0.05         | 2.81E-01               |
| PITX2-Pr             | 0.89 ± 0.06        | 1.52E-01               | ERK-RE               | 0.80 ± 0.15         | 4.92E-02               |
| ERK-RE               | 0.83 ± 0.03        | 2.52E-03               | p53-RE               | 0.78 ± 0.14         | 3.05E-01               |
| Nanog-RE             | 0.83 ± 0.09        | 4.62E-01               | STAT3-RE             | 0.75 ± 0.20         | 6.20E-02               |
| MEF2-RE              | 0.82 ± 0.07        | 1.26E-03               | MEF2-RE              | 0.59 ± 0.11         | 3.00E-04               |
| MKL2-Pr              | 0.68 ± 0.05        | 4.70E-02               | MKL2-Pr              | 0.53 ± 0.32         | 4.16E-01               |
