# Supplementary material for: Lentivirus Live Cell Array for Quantitative Assessment of Gene and Pathway Activation during Myogenic Differentiation of Mesenchymal Stem Cells
Source: PubMed Central journal article supplement (PMC4624764; doi:10.1371/journal.pone.0141365), 2015-10-27
Supplement: pone.0141365.s006.pdf [file pone.0141365.s006.pdf]

**S5 Table. Promoters and Response Element Activation**

| <i>Pr/RE</i>      | <i>Time of activation (hours)</i> |                      |
|-------------------|-----------------------------------|----------------------|
|                   | <i>hBM-MSK (n=2)</i>              | <i>hHF-MSK (n=3)</i> |
| <b>SMAD2/3-RE</b> | <b>20.00 ± 5.66</b>               | <b>45.33 ± 12.22</b> |
| <b>SMAD7-RE</b>   | <b>16.00 ± 0.00</b>               | <b>21.33 ± 4.62</b>  |
| <b>CArG-RE</b>    | <b>20.00 ± 5.66</b>               | <b>21.33 ± 4.62</b>  |
| <b>CArGA-RE</b>   | <b>32.00 ± 0.00</b>               | <b>61.33 ± 9.24</b>  |
| <b>KLF4-RE</b>    | <b>116.00 ± 16.97</b>             | <b>80.00 ± 16.00</b> |
| <b>ACTA2-Pr</b>   | <b>20.00 ± 5.66</b>               | <b>40.00 ± 8.00</b>  |
| <b>SM22-Pr</b>    | <b>52.00 ± 5.65</b>               | <b>64.00 ± 8.00</b>  |
| <b>rMYH11-Pr</b>  | <b>52.00 ± 5.65</b>               | <b>92.00 ± 16.97</b> |
| <b>ACTB-Pr</b>    | <b>48.00 ± 0.00</b>               | <b>37.33 ± 12.22</b> |
