# Supplementary material for: Lentivirus Live Cell Array for Quantitative Assessment of Gene and Pathway Activation during Myogenic Differentiation of Mesenchymal Stem Cells
Source: PubMed Central journal article supplement (PMC4624764; doi:10.1371/journal.pone.0141365), 2015-10-27
Supplement: pone.0141365.s007.pdf [file pone.0141365.s007.pdf]

**S6 Table. List of Genes**

| <i>UniGene Symbol</i> | <i>UniGene Name</i>                                                                           |
|-----------------------|-----------------------------------------------------------------------------------------------|
| ACTA2                 | Actin, alpha 2, smooth muscle, aorta                                                          |
| ACTB                  | Actin, Beta                                                                                   |
| ATF6                  | Activating transcription factor 6                                                             |
| CNN1                  | Calponin 1                                                                                    |
| CSRP2                 | Cysteine and glycine-rich protein 2                                                           |
| DES                   | Desmin                                                                                        |
| EGR1                  | Early growth response 1                                                                       |
| HIF1                  | Hypoxia inducible factor 1                                                                    |
| KLF4                  | Kruppel-like factor 4                                                                         |
| MEF2                  | Myocyte Enhancer Factor 2                                                                     |
| MKL1                  | Megakaryoblastic leukemia (translocation) 1, Myocardin-related transcription factor A (MRTFA) |
| MKL2                  | Megakaryoblastic leukemia (translocation) 2, Myocardin-related transcription factor B (MRTFB) |
| MYH11                 | Myosin, Heavy Chain 11, Smooth Muscle                                                         |
| PITX2                 | Paired-like homeodomain 2                                                                     |
| SM22                  | Transgelin                                                                                    |
| SMTNB                 | Smoothelin B                                                                                  |
| SP1                   | Sp1 transcription factor                                                                      |
| STAT3                 | Signal transducer and activator of transcription 3                                            |
| VCL                   | Vinculin                                                                                      |
